1    **Adverse childhood experiences and their impacts on subsequent depression and**  
2    **cognitive impairment in Chinese adults**

3                   Tiantian Zhang<sup>1</sup>   Lena Kan<sup>2</sup>   Changbo Jin<sup>3</sup>   Wenming Shi<sup>3,4\*</sup>

4    1. School of Social Development and Public Policy, Fudan University, Shanghai,  
5    China.

6    2. Department of International Health, Bloomberg School of Public Health, Johns  
7    Hopkins University, Baltimore, Maryland, USA

8    3. Tongji University School of Medicine, Shanghai, China

9    4. School of Public Health, Fudan University, Shanghai, China.

10

11    **\*\*Correspondence:** Wenming Shi,   Ph.D

12    **E-mail:** shiwmfd@126.com

13    **Address:** No. 2699, West Gaoke Road, Pudong New District, Shanghai, China

14

15

16

17

18    **Conflict of interests:** None declared

19

20

21

22

23

24

25

26

27

28

29 **Abstract**

30 **Background:** Adverse childhood experiences (ACEs) are prevalent and have long  
31 lasting effects. This study aimed to explore the associations between ACEs exposure  
32 with subsequent depression and cognitive impairment and to assess whether  
33 sociodemographic characteristics modify these associations.

34 **Method:** A total of 14,484 participants from the China Health and Retirement  
35 Longitudinal Study (CHARLS) 2015 and life history survey in 2014 were  
36 enrolled. Depression was assessed by the 10-item Center for Epidemiologic Studies  
37 Depression scale. Cognitive performance was evaluated by three composite  
38 measures: episodic memory, mental intactness and global cognition. A wide range of  
39 12 ACE indicators were measured by a validated questionnaire. Multiple regression  
40 models and stratified analysis explore the relationship between accumulated ACEs  
41 with subsequent depression and cognitive impairment and potential modifiers.

42 **Results:** Compared with individuals without ACEs, those who experienced four or  
43 more ACEs have a higher risk of subsequent depression (adjusted odds ratio,  
44 aOR=2.65, 95% confidence intervals [CIs]: 2.21-3.16), poorer mental intactness ( $\beta$ =  
45 -0.317 [-0.508 to -0.125]) and worse global cognition ( $\beta$ = -0.437 [-0.693 to -0.181]).  
46 Trend analyses showed a dose-response association between accumulated ACEs with  
47 subsequent depression and cognitive impairment. The modifications of the  
48 association by age, sex, educational level and family's financial status during  
49 childhood were not observed.

50 **Conclusion:** Our study suggests that higher ACEs exposure increases the risk of

51 subsequent depression and cognitive impairment in Chinese adults regardless of  
52 sociodemographic characteristics. The findings provide important implications for  
53 mitigating the adverse effects of early-life stress and promoting health in adulthood.

54

55 **Key words:** Adverse childhood experiences; Depression; Cognitive impairment;  
56 Physical abuse; Adults

57

58

## 59 **Introduction**

60 Adverse childhood experiences (ACEs), refer to a wide range of intensive  
61 stressors that occur before the age of 18, such as emotional neglect and physical  
62 abuse, which may affect children while growing up (Hughes et al., 2021). The  
63 theoretical framework from previous studies indicates that early-life trauma and  
64 adversities affect social, emotional and psychological domains through changes in  
65 neurodevelopmental trajectories (Shonkoff and Garner, 2012), and subsequently lead  
66 to an increased risk for lifelong health and well-being (Hughes et al., 2021).

67 Depression (depressive symptoms and depressive disorders) and cognitive  
68 impairment represent big challenges to global public health as both are highly  
69 prevalent (Kessler et al., 2009; Lu et al., 2021; Richardson et al., 2019). A growing  
70 number of studies indicated that accumulated ACEs were linked to alterations in  
71 brain structures and poorer neurodevelopmental functions across a variety of brain  
72 regions, such as limbic, hippocampal, prefrontal, and increased risks of depression,  
73 anxiety and suicide attempts later in life (Abbott and Slack, 2021; Dannlowski et al.,

74 2012; Hawkins et al., 2021; Polanco-Roman et al., 2021). However, most previous  
75 studies are primarily from western countries including North America (Gould et al.,  
76 2012; Hawkins et al., 2021) and Europe (Houtepen et al., 2020), and few studies have  
77 focused on these associations in developing countries such as China, where ACEs  
78 are more prevalent (Houtepen et al., 2020).

79 The conventional ACE scale, which consists of 10 items determined by the  
80 Centers for Disease Control and Prevention (CDC) in the Kaiser study, is mostly  
81 used as an assessment tool in past publication (Felitti et al., 1998). Nevertheless,  
82 many concerns in recent years suggest that the conventional ACE scale may not  
83 adequately reflect the perceived childhood adversities in other populations  
84 (Cronholm et al., 2015). A set of new ACE indicators, such as unsafe neighbourhood,  
85 parental disability or sibling death have also been reported to be prevalent in  
86 ACE-related study (Cronholm et al., 2015; Rod et al., 2020). Socioeconomic and  
87 demographic characteristics, whether independent or clustered together, may be  
88 compounded to affect the association between ACEs exposure and health outcomes  
89 (Houtepen et al., 2020; Naicker et al., 2021). However, due to the differences in  
90 regional culture, study design and population, the findings are not consistent  
91 (Houtepen et al., 2020; Schickedanz et al., 2021). To build upon existing literature, a  
92 large-scale study with comprehensively clustering of ACE indicators is timely  
93 needed.

94 In this study, we used data from the China Health and Retirement Longitudinal  
95 Study (CHARLS), a national representative sample in China, to investigate the

96 association of early-life exposure to accumulated ACEs and each individual  
97 indicator with depression and cognitive impairment in later life. Furthermore, we  
98 also evaluated whether the associations were modified by sociodemographic  
99 characteristics of age, sex, educational level and family's financial status during  
100 childhood.

101

## 102 **Methods**

### 103 **Study design and participants**

104 This study was based on the CHARLS project, a nationwide representative  
105 survey of middle-aged and older adults covering 450 villages/resident committees  
106 from 28 provinces across mainland China. The details about the study design and  
107 sampling method have been reported in previous literature(Zhao et al., 2014). Briefly,  
108 the participants were recruited by a multistage probability sampling strategy, 17708  
109 respondents were included in the baseline survey, and follow-up every two years.  
110 During the survey, the information on sociodemographic characteristics, behaviour  
111 and lifestyles, health conditions and functions as well as related biomarkers were  
112 collected. In the current study, we used the third wave of CHARLS study in 2015  
113 consisting of 21,095 individuals, and then matched to the 2014 CHARLS life history  
114 survey (N=20,544). A total of 18,678 participants who completed both the two  
115 surveys were enrolled. After excluding individuals with missing data on mental  
116 health outcomes, ACE indicators and other possible confounders, a total of 14,484  
117 participants from 126 Chinese cities were included in the final analysis. The

118 geographical locations of the cities are displayed in Figure 1. Ethics approval was  
119 obtained from the Biomedical Ethics Review Committee of Peking University (Nu:  
120 IRB00001052-11015). All participants provided their written informed consents.  
121 The flowchart showed the participants' enrollment (Figure S1).

## 122 **Measurement of depression**

123 Depression was measured by using the 10-item Center for Epidemiologic  
124 Studies Depression scale (CES-D-10). The validity of the CES-D-10 has been  
125 examined among Chinese adults (Boey, 1999). Each question was used to measure  
126 the frequency of a specific type of negative mood, where 0 indicated rarely or none;  
127 1(some days); 2 (occasionally) or 3 (most of the times), respectively. We calculated  
128 the total of each specific-question score as the depressive score to assess the general  
129 status of depression. The total score ranges from 0 to 30, with a higher score  
130 indicating more depressive disorders. A categorical variable for the CES-D-10 score  
131 was applied to evaluate the depression based on a cut-off of 12(Li et al., 2019).

## 132 **Cognitive performance assessment**

133 In line with previous CHARLS publications (Li et al., 2017; Rong et al., 2020),  
134 three composite measures of cognition score were adopted: a word-recall test,  
135 Telephone Interview of Cognitive Status (TICS-10) and a figure drawing test. The  
136 word-recall test was performed to assess the episodic memory, which asked the  
137 respondents to memorize and immediately recall ten Chinese nouns that had just  
138 been read to them in any order (immediate recall) and recalled the same word list  
139 after four minutes (delayed recall). The episodic memory score consists of the

140 average of the immediate recall and delayed recalls, which ranged from 0 to 10. The  
141 TICS-10 and a figure drawing test were performed to evaluate the mental intactness  
142 related to orientation to time and attention, and visuospatial abilities. Ten mental  
143 status questions from the TICS including serial subtraction of 7 from 100 (up to five  
144 times), date (month, day, year), day of the week, and season of the year were  
145 recorded, and subjects were requested to redraw a picture of two overlapped  
146 pentagons. These scores were summed as a mental intactness indicator and ranged  
147 from 0 to 11. The global cognition score was generated by summing up the score of  
148 episodic memory and mental intactness, and considered as the primary outcomes of  
149 interests on cognitive performance. The global cognition score ranged from 0 to 21,  
150 with a higher score indicating a better cognition function (Rong et al., 2020).

### 151 **Measurement of adverse childhood experiences**

152 We used a wide range of 12 ACE indicators from the CHALRS study, which  
153 could be classified into four categories: 1) child maltreatment (physical abuse,  
154 emotional neglect); 2) exposure to violence (domestic violence, peer bullying and  
155 unsafe neighbourhood ); 3) parent/ sibling death or disability (parental death,  
156 parental disability, and sibling death); 4) parental maladjustment (household mental  
157 illness, substance abuse, parental separation or divorce and incarcerated household  
158 member). Table S1 presents the details about the definition and questionnaire  
159 descriptions of each items of individual indicator. Response to each ACE indicator  
160 was dichotomized (0 vs.1) and then summed to generate a cumulative number for  
161 each participant, ranging from 0 to 12. We classified the participants into five

162 subgroups according to the cumulative numbers of ACE indicators: 0, 1, 2, 3 and  $\geq$

163 4.

#### 164 **Covariates**

165 Individual information on sociodemographic characteristics, behaviour and  
166 lifestyles, and self-reported chronic conditions were collected by a validated  
167 CHARLS questionnaire. The sociodemographic characteristics included age, sex,  
168 body mass index (BMI), educational level, marriage status (married v.s unmarried),  
169 maternal education, paternal education, and family's financial status during  
170 childhood (which assessed by the question " When you were a child before the age  
171 of 17 years, compared to the average family in the same community/village, how  
172 was your family's financial situation?" and was divided into two categories: same as  
173 or better than others vs. worse than others). The behaviour and lifestyles factors  
174 including cigarette smoking status (current; former: quitted smoking  $\geq$  three years;  
175 never), alcohol consumption, social activity (yes vs. no) and night sleep duration  
176 were also recorded. The self-reported chronic diseases such as hypertension, diabetes  
177 and heart diseases were collected.

#### 178 **Statistical analyses**

179 Descriptive statistics were performed for all sociodemographic characteristics,  
180 behaviour and lifestyle and chronic conditions data. The prevalence of subsequent  
181 depression and average cognitive score were calculated and compared among each  
182 ACE subgroup, respectively. Multivariate logistics regression and generalized linear  
183 regression models were conducted to explore the relationship between each items of



184 individual ACE indicator or accumulated ACEs and risk of depression and cognition  
185 disorders decline in later life, respectively. Both the crude and adjusted models were  
186 performed. The odds ratio (OR) or  $\beta$ -coefficient and 95% confidence intervals  
187 (95%CI) were calculated to report the association. The covariates in the adjusted  
188 model included age, sex, BMI, educational level, marriage status, maternal education,  
189 paternal education, family's financial status during childhood, cigarette smoking  
190 status, alcohol consumption, social activity, night sleep duration and chronic diseases.  
191 Trend analyses were used to examine whether a dose-response association was  
192 present.

193 To examine the effect modifiers of several sociodemographic variables,  
194 stratified analyses were use by the following variables: sex (men compared with  
195 women), age ( $\geq 65$  years compared with  $< 65$  years), educational level ( $\geq$  middle  
196 school compared with  $<$  middle school) and family's financial status during  
197 childhood (same as or better than others compared with worse than others).  
198 Interaction of accumulated ACEs and each aforementioned variable was also  
199 evaluated in the regression models.

200 In addition to the main analysis, we performed a sensitivity analysis by  
201 exploring the association between accumulated ACEs exposure of seven  
202 conventional indicators as reported in a previous publication (Lin et al., 2021) with  
203 depression and cognitive impairment in our study.

204 All statistical analyses were performed by STATA 16.0 (Stata Corp., College  
205 Station, TX, USA) and R software (version: 4.1.2). All  $p$  values were two-sided, and  
206 significance was defined as  $p < 0.05$ .

## 207 **Results**

208 All the sociodemographic characteristics, behaviours and lifestyles factors,  
209 chronic diseases according to the number of ACEs were summarized (Table 1). Of  
210 the 14,484 participants enrolled, 6925 (47.8%) were men, and the average age was  
211  $60.7 \pm 9.5$  years. Overall, 79.7% of the participants reported experiencing one or  
212 more ACEs, and 10.5% had four or more ACEs (Table 1). Compared with those  
213 without any ACEs, individuals who experienced four or more ACEs were more  
214 likely to be older, of low educational level, unmarried, of worse financial status  
215 during childhood, and more likely to have less sleep and poorer health conditions  
216 (Table 1). The prevalence of each item of the ACE indicators as well as accumulated  
217 ACEs groups are shown in Figure 2. We observed that the prevalence of depression  
218 was associated with an increasing trend with the growing number of ACE indicators  
219 (Figure 3). Regarding cognitive performance, we found that the mean score of  
220 episodic memory, mental intactness, and global cognition were decreased along with  
221 an increasing number of ACEs (Figure 3).

222 The multivariate regression model showed that individuals who experienced  
223 four or more ACEs had a significantly higher risk of depression and cognition  
224 decline later in life, compared with those without ACEs. After controlling for related  
225 confounders, the adjusted OR or  $\beta$  and 95%CI were 2.65 (2.21, 3.16) for depression,

226 -0.317 (-0.508, -0.125) for mental intactness, and -0.437 (-0.693, -0.181) for global  
227 cognition score, respectively. The trend analysis indicated a significant  
228 dose-response relationship between cumulative ACEs exposure with risk of  
229 subsequent depression and cognitive impairment ( $P_{\text{trend}}$  ranged from 0.033 to <0.001,  
230 Table 2). Meanwhile, no significant association between accumulated ACEs  
231 exposure and episodic memory in adulthood was observed in model  $\square$  (Table 2).  
232 When looking at the specific item of ACE indicators, the results showed that both  
233 household mental illness and unsafe neighbourhood were significantly related with  
234 increased risks of depression and cognition decline. In addition, we also found that  
235 the risk of subsequent depression was significantly increased when early-life  
236 exposure to physical abuse (aOR:1.34, 1.20-1.48), domestic violence (aOR:1.44,  
237 1.23-1.69), peer bullying (aOR:1.73, 1.53-1.96), parental disability (aOR:1.54,  
238 1.39-1.72) or sibling death (aOR:1.21, 1.09-1.36) separately. Meanwhile, a  
239 significant association of cognitive disorders was observed in those exposure to  
240 specific individual indicator of substance abuse and parental death. Details of the  
241 association of each item of ACEs are shown in Figure S3. The stratified analysis  
242 presented similar outcomes and a significant dose-response relationship. However,  
243 we didn't observe that sociodemographic characteristics of age, sex, educational  
244 level and family's financial status during childhood significantly modified the  
245 association between ACEs and health outcomes among the participants ( $P_{\text{all}} > 0.05$ ,  
246 Table 3) .  
247

248 Similar associations were also observed in the sensitivity analysis when exploring  
249 the seven conventional ACEs indicators exposure with depression and cognitive  
250 impairment (Table S3).

## 251 **Discussion**

252 This nationwide population-based study suggests that exposure to ACEs was  
253 significantly associated with an increased risk of subsequent depression and  
254 cognitive impairment in Chinese adults. A significant dose-response relationship  
255 between the accumulated ACEs and subsequent depression and cognition decline  
256 was observed. Our findings did not show that sociodemographic characteristics of  
257 sex, age, educational level, and family's financial status during childhood modify the  
258 association between early-life exposure to childhood adversities with mental health  
259 later in life.

260 Similar to previous studies in western countries (Abbott and Slack, 2021;  
261 Dantchev et al., 2019; Gould et al., 2012), we observed significant associations  
262 between exposure to ACEs with adult mental health, despite cultural differences.  
263 Given the insufficiency of conventional ACE scale from the CDC-Kaiser ACE study  
264 was generated based on a sample of mostly white and educated individuals (Felitti et  
265 al., 1998), we evaluated a more comprehensive range of ACE indicators in this study.  
266 Consistent with existing literature (Gal et al., 2011; Wang, 2020), our findings  
267 observed that physical abuse during early-life, domestic violence or peer bullying  
268 were related with an elevated risk of adult depression. For cognitive performance,  
269 we found that the specific categories of ACE indicators of parental maladjustment,

270 i.e: household mental illness and substance abuse were linked to an elevated risk of  
271 cognitive impairment in adulthood, which was in parallel with previous studies  
272 (Bennett et al., 2012; Schickedanz et al., 2021). A likely explanation was that familial  
273 factors during childhood including shared genetic factors and a living environment  
274 have long-lasting effects on children's health (Ferraro and Shippee, 2009).

275         Since ACEs do not occur in isolation, but rather tend to co-occur among  
276 children. Those living with parents who have a mental illness tend to receive  
277 inadequate emotional care and easily be influenced by substance abuse and violence  
278 from parents, all of which increased the risks of cognitive impairment later in life.

279         Identifying how different ACEs exposure on depression and cognitive  
280 impairment in adulthood could help reduce the risks across the life course(Gehred et  
281 al., 2021). However, to date, the underlying mechanisms about ACEs exposure and  
282 mental health are still not well-known. One possible explanation is that prolonged  
283 stress caused by ACEs may lead to chronic activation of the hypothalamic-  
284 pituitary-adrenal (HPA) axis and then increase allostatic load and disrupt the  
285 regulation of neuroendocrine, immune and autonomic nervous (Kuhlman et al.,  
286 2018). Future studies are needed to enhance the understanding of the biological  
287 pathology of childhood adversities.

288         In this study, we did not observe the modification of certain sociodemographic  
289 variables on the association of ACEs and depression and cognitive impairment in  
290 later life. These results were consistent with several previous studies regardless of  
291 sex, household income status or socioeconomic situation (Houtepen et al., 2020; Lin

292 et al., 2021). In contrast, some another studies reported that social support might  
293 mitigate the deleterious effects of childhood advertises on health outcomes (Cheong  
294 et al., 2017; Jaffee et al., 2017). These indicated that social resources, rather than  
295 individual-level characteristics, could be important modifiers to buffer the adverse  
296 effects of ACEs on adult health. Therefore, further explorations are needed to  
297 advance the current findings.

### 298 **Strengths and limitations**

299 Our study has several strengths. Firstly, this was one of the few studies in a  
300 developing country to investigate a comprehensive range of ACE indicators and  
301 subsequent depression and cognitive impairment by a nationwide representative  
302 sample, which provided important implications that critical and persisting influence  
303 of childhood advertises might have across the life course. Secondly, we assessed the  
304 modification of the association by several sociodemographic characteristics, which  
305 built upon existing literature. Thirdly, the findings indicated that certain predictive  
306 factors such as physical abuse, household mental illness and domestic violence ,  
307 which might help policy-makers or researchers to make intervention strategies to  
308 address mental health later in life. Lastly, the robustness of the association of  
309 accumulated ACEs and specific indicators of ACE with subsequent outcomes serves  
310 as a basis for creating a public health program to promote mental health across the  
311 life course.

312 Several limitations have been acknowledged. Firstly, the causal relationship is  
313 difficult to draw due to the cross-sectional design. Secondly, the ACE indicators

314 were measured based on self-report, which might lead to recall bias. Thirdly, the  
315 ACE indicator of sexual abuse could not be evaluated due to the data was not  
316 available, despite a wide range of indicators being analyzed in our study. Lastly, the  
317 information on other potential confounders, such as physical activity, dietary  
318 nutrition, and medical treatment or assistive devices that mitigate the effect of mental  
319 illness were not collected. For all these limitations mentioned above, the findings  
320 should be interpreted with caution.

### 321 **Conclusions**

322 In this nationwide population-based study, a dose-response association was  
323 observed between the accumulated ACEs and increased risks of subsequent  
324 depression and cognitive impairment among Chinese adults. The current findings  
325 indicate that sociodemographic characteristics of age, sex, educational level and  
326 family's financial status during childhood did not modify such association.  
327 Considering China's rapidly aging population and high prevalence of mental  
328 disorders, our study provides important public health implications for reducing  
329 childhood adversities and improving overall health and well-being in later life.

330

331

### 332 **Conflict of interest**

333 None reported

### 334 **Funding**

335 This work was supported by the Development Research Center of Shanghai

336 Municipal People's Government (grant nu: 2021-S-13).

337

338 **Authors' contribution**

339 Concept and design : WS; Acquisition, analysis, or interpretation of data: TZ and

340 WS; Drafting of the manuscript: TZ and WS; Critical revision of the manuscript :

341 LK, CJ, WS; Statistical analysis: WS; Supervision: WS

342

343 **Acknowledgement**

344 We thank the Peking National Center for Economic Research for providing the

345 CHARLS data. We are grateful to all the participants and on-site researchers in the

346 project.

347

348

349

350

351

352

353

354

355

356

357

358

359

360

361 **References**

362 Abbott, M., Slack, K.S., 2021. Exploring the relationship between childhood adversity



- 363 and adult depression: A risk versus strengths-oriented approach. *Child Abuse*  
364 *Negl* 120, 105207. <https://doi.org/10.1016/j.chiabu.2021.105207>.
- 365 Bennett, A.C., Brewer, K.C., Rankin, K.M., 2012. The association of child mental  
366 health conditions and parent mental health status among U.S. Children, 2007.  
367 *Matern Child Health J* 16, 1266-1275. [https://doi.org/10.1007/s](https://doi.org/10.1007/s10995-011-0888-4)  
368 [10995-011-0888-4](https://doi.org/10.1007/s10995-011-0888-4).
- 369 Boey, K.W., 1999. Cross-validation of a short form of the CES-D in Chinese elderly.  
370 *Int J Geriatr Psychiatry* 14, 608-617. [https://doi.org/10.1002/\(sici\)](https://doi.org/10.1002/(sici)1099-1166(199908)14:8<608::aid-gps991>3.0.co;2-z)  
371 [1099-1166\(199908\)14:8<608::aid-gps991>3.0.co;2-z](https://doi.org/10.1002/(sici)1099-1166(199908)14:8<608::aid-gps991>3.0.co;2-z).
- 372 Cheong, E.V., Sinnott, C., Dahly, D., Kearney, P.M., 2017. Adverse childhood  
373 experiences (ACEs) and later-life depression: perceived social support as a  
374 potential protective factor. *Bmj Open* 7, e13228.  
375 <https://doi.org/10.1136/bmjopen-2016-013228>.
- 376 Cronholm, P.F., Forke, C.M., Wade, R., Bair-Merritt, M.H., Davis, M.,  
377 Harkins-Schwarz, M., Pachter, L.M., Fein, J.A., 2015. Adverse Childhood  
378 Experiences: Expanding the Concept of Adversity. *Am J Prev Med* 49, 354-361.  
379 <https://doi.org/10.1016/j.amepre.2015.02.001>.
- 380 Dannlowski, U., Stuhrmann, A., Beutelmann, V., Zwanzger, P., Lenzen, T., Grotegerd,  
381 D., Domschke, K., Hohoff, C., Ohrmann, P., Bauer, J., Lindner, C., Postert, C.,  
382 Konrad, C., Arolt, V., Heindel, W., Suslow, T., Kugel, H., 2012. Limbic scars:  
383 long-term consequences of childhood maltreatment revealed by functional and  
384 structural magnetic resonance imaging. *Biol Psychiatry* 71, 286-293.  
385 <https://doi.org/10.1016/j.biopsych.2011.10.021>.
- 386 Dantchev, S., Hickman, M., Heron, J., Zammit, S., Wolke, D., 2019. The Independent  
387 and Cumulative Effects of Sibling and Peer Bullying in Childhood on  
388 Depression, Anxiety, Suicidal Ideation, and Self-Harm in Adulthood. *Front*  
389 *Psychiatry* 10, 651. <https://doi.org/10.3389/fpsy.2019.00651>.
- 390 Felitti, V.J., Anda, R.F., Nordenberg, D., Williamson, D.F., Spitz, A.M., Edwards, V.,  
391 Koss, M.P., Marks, J.S., 1998. Relationship of childhood abuse and household  
392 dysfunction to many of the leading causes of death in adults. The Adverse

- 393 Childhood Experiences (ACE) Study. *Am J Prev Med* 14, 245-258.  
394 [https://doi.org/10.1016/s0749-3797\(98\)00017-8](https://doi.org/10.1016/s0749-3797(98)00017-8).
- 395 Ferraro, K.F., Shippee, T.P., 2009. Aging and cumulative inequality: how does  
396 inequality get under the skin? *Gerontologist* 49, 333-343.  
397 <https://doi.org/10.1093/geront/gnp034>.
- 398 Gal, G., Levav, I., Gross, R., 2011. Psychopathology among adults abused during  
399 childhood or adolescence: results from the Israel-based World Mental Health  
400 Survey. *J Nerv Ment Dis* 199, 222-229. [https://doi.org/10.1097](https://doi.org/10.1097/NMD.0b013e31820c7543)  
401 [/NMD.0b013e31820c7543](https://doi.org/10.1097/NMD.0b013e31820c7543).
- 402 Gehred, M.Z., Knodt, A.R., Ambler, A., Bourassa, K.J., Danese, A., Elliott, M.L.,  
403 Hogan, S., Ireland, D., Poulton, R., Ramrakha, S., Reuben, A., Sison, M.L.,  
404 Moffitt, T.E., Hariri, A.R., Caspi, A., 2021. Long-term Neural Embedding of  
405 Childhood Adversity in a Population-Representative Birth Cohort Followed for  
406 5 Decades. *Biol Psychiatry* 90, 182-193. [https://doi.org/10.1016/](https://doi.org/10.1016/j.biopsych.2021.02.971)  
407 [j.biopsych.2021.02.971](https://doi.org/10.1016/j.biopsych.2021.02.971).
- 408 Gould, F., Clarke, J., Heim, C., Harvey, P.D., Majer, M., Nemeroff, C.B., 2012. The  
409 effects of child abuse and neglect on cognitive functioning in adulthood. *J*  
410 *Psychiatr Res* 46, 500-506. <https://doi.org/10.1016/j.jpsychires.2012.01.005>.
- 411 Hawkins, M., Layman, H.M., Ganson, K.T., Tabler, J., Ciciolla, L., Tsotsoros, C.E.,  
412 Nagata, J.M., 2021. Adverse childhood events and cognitive function among  
413 young adults: Prospective results from the national longitudinal study of  
414 adolescent to adult health. *Child Abuse Negl* 115, 105008.  
415 <https://doi.org/10.1016/j.chiabu.2021.105008>.
- 416 Houtepen, L.C., Heron, J., Suderman, M.J., Fraser, A., Chittleborough, C.R., Howe,  
417 L.D., 2020. Associations of adverse childhood experiences with educational  
418 attainment and adolescent health and the role of family and socioeconomic  
419 factors: A prospective cohort study in the UK. *Plos Med* 17, e1003031.  
420 <https://doi.org/10.1371/journal.pmed.1003031>.
- 421 Hughes, K., Ford, K., Bellis, M.A., Glendinning, F., Harrison, E., Passmore, J., 2021.  
422 Health and financial costs of adverse childhood experiences in 28 European

- 423 countries: a systematic review and meta-analysis. *Lancet Public Health* 6,  
424 e848-e857. [https://doi.org/10.1016/S2468-2667\(21\)00232-2](https://doi.org/10.1016/S2468-2667(21)00232-2).
- 425 Jaffee, S.R., Takizawa, R., Arseneault, L., 2017. Buffering effects of safe, supportive,  
426 and nurturing relationships among women with childhood histories of  
427 maltreatment. *Psychol Med* 47, 2628-2639.  
428 <https://doi.org/10.1017/S0033291717001027>.
- 429 Kessler, R.C., Aguilar-Gaxiola, S., Alonso, J., Chatterji, S., Lee, S., Ormel, J., Ustun,  
430 T.B., Wang, P.S., 2009. The global burden of mental disorders: an update from  
431 the WHO World Mental Health (WMH) surveys. *Epidemiol Psychiatr Soc* 18,  
432 23-33. <https://doi.org/10.1017/s1121189x00001421>.
- 433 Kuhlman, K.R., Geiss, E.G., Vargas, I., Lopez-Duran, N., 2018. HPA-Axis Activation  
434 as a Key Moderator of Childhood Trauma Exposure and Adolescent Mental  
435 Health. *J Abnorm Child Psychol* 46, 149-157.  
436 <https://doi.org/10.1007/s10802-017-0282-9>.
- 437 Li, H., Zheng, D., Li, Z., Wu, Z., Feng, W., Cao, X., Wang, J., Gao, Q., Li, X., Wang,  
438 W., Hall, B.J., Xiang, Y.T., Guo, X., 2019. Association of Depressive Symptoms  
439 With Incident Cardiovascular Diseases in Middle-Aged and Older Chinese  
440 Adults. *JAMA Netw Open* 2, e1916591. [https://doi.org/10.1001/](https://doi.org/10.1001/jamanetworkopen.2019.16591)  
441 [jamanetworkopen.2019.16591](https://doi.org/10.1001/jamanetworkopen.2019.16591).
- 442 Li, J., Cacchione, P.Z., Hodgson, N., Riegel, B., Keenan, B.T., Scharf, M.T., Richards,  
443 K.C., Gooneratne, N.S., 2017. Afternoon Napping and Cognition in Chinese  
444 Older Adults: Findings from the China Health and Retirement Longitudinal  
445 Study Baseline Assessment. *J Am Geriatr Soc* 65, 373-380.  
446 <https://doi.org/10.1111/jgs.14368>.
- 447 Lin, L., Wang, H.H., Lu, C., Chen, W., Guo, V.Y., 2021. Adverse Childhood  
448 Experiences and Subsequent Chronic Diseases Among Middle-aged or Older  
449 Adults in China and Associations With Demographic and Socioeconomic  
450 Characteristics. *JAMA Netw Open* 4, e2130143. [https://doi.org/10.1001/](https://doi.org/10.1001/jamanetworkopen.2021.30143)  
451 [jamanetworkopen.2021.30143](https://doi.org/10.1001/jamanetworkopen.2021.30143).
- 452 Lu, J., Xu, X., Huang, Y., Li, T., Ma, C., Xu, G., Yin, H., Xu, X., Ma, Y., Wang, L.,

- 453 Huang, Z., Yan, Y., Wang, B., Xiao, S., Zhou, L., Li, L., Zhang, Y., Chen, H.,  
454 Zhang, T., Yan, J., Ding, H., Yu, Y., Kou, C., Shen, Z., Jiang, L., Wang, Z., Sun,  
455 X., Xu, Y., He, Y., Guo, W., Jiang, L., Li, S., Pan, W., Wu, Y., Li, G., Jia, F., Shi, J.,  
456 Shen, Z., Zhang, N., 2021. Prevalence of depressive disorders and treatment in  
457 China: a cross-sectional epidemiological study. *Lancet Psychiat* 8, 981-990.  
458 [https://doi.org/10.1016/S2215-0366\(21\)00251-0](https://doi.org/10.1016/S2215-0366(21)00251-0).
- 459 Naicker, S.N., Norris, S.A., Richter, L.M., 2021. Secondary analysis of retrospective  
460 and prospective reports of adverse childhood experiences and mental health in  
461 young adulthood: Filtered through recent stressors. *EClinicalMedicine* 40,  
462 101094. <https://doi.org/10.1016/j.eclinm.2021.101094>.
- 463 Polanco-Roman, L., Alvarez, K., Corbeil, T., Scorza, P., Wall, M., Gould, M.S.,  
464 Alegria, M., Bird, H., Canino, G.J., Duarte, C.S., 2021. Association of Childhood  
465 Adversities With Suicide Ideation and Attempts in Puerto Rican Young Adults.  
466 *Jama Psychiat* 78, 896-902. <https://doi.org/10.1001/jamapsychiatry.2021.0480>.
- 467 Richardson, C., Stephan, B., Robinson, L., Brayne, C., Matthews, F.E., 2019.  
468 Two-decade change in prevalence of cognitive impairment in the UK. *Eur J*  
469 *Epidemiol* 34, 1085-1092. <https://doi.org/10.1007/s10654-019-00554-x>.
- 470 Rod, N.H., Bengtsson, J., Budtz-Jorgensen, E., Clipet-Jensen, C., Taylor-Robinson, D.,  
471 Andersen, A.N., Dich, N., Rieckmann, A., 2020. Trajectories of childhood  
472 adversity and mortality in early adulthood: a population-based cohort study.  
473 *Lancet* 396, 489-497. [https://doi.org/10.1016/S0140-6736\(20\)30621-8](https://doi.org/10.1016/S0140-6736(20)30621-8).
- 474 Rong, H., Lai, X., Jing, R., Wang, X., Fang, H., Mahmoudi, E., 2020. Association of  
475 Sensory Impairments With Cognitive Decline and Depression Among Older  
476 Adults in China. *JAMA Netw Open* 3, e2014186. <https://doi.org/10.1001/jamanetworkopen.2020.14186>.
- 478 Schickedanz, H.B., Jennings, L.A., Schickedanz, A., 2021. The Association Between  
479 Adverse Childhood Experiences and Positive Dementia Screen in American  
480 Older Adults. *J Gen Intern Med*. <https://doi.org/10.1007/s11606-021-07192-8>.
- 481 Shonkoff, J.P., Garner, A.S., 2012. The lifelong effects of early childhood adversity  
482 and toxic stress. *Pediatrics* 129, e232-e246. [https://doi.org/ 10.1542/](https://doi.org/10.1542/)

483 peds.2011-2663.

484 Wang, Q., 2020. Association of Childhood Intrafamilial Aggression and Childhood  
485 Peer Bullying With Adult Depressive Symptoms in China. *JAMA Netw Open* 3,  
486 e2012557. <https://doi.org/10.1001/jamanetworkopen.2020.12557>.

487 Zhao, Y., Hu, Y., Smith, J.P., Strauss, J., Yang, G., 2014. Cohort profile: the China  
488 Health and Retirement Longitudinal Study (CHARLS). *Int J Epidemiol* 43,  
489 61-68. <https://doi.org/10.1093/ije/dys203>.

490

491

492

493

494

495

496

497

498

499

500

501

502

503

504

505

506

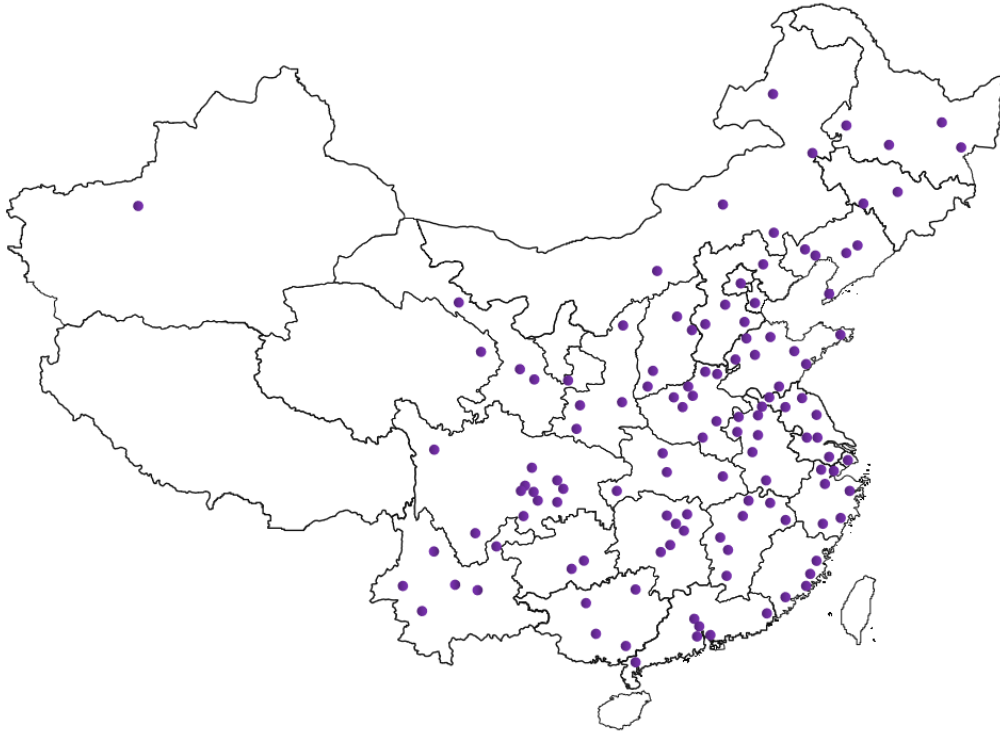

507

508

509

510

511

Figure 1. The geographical locations of the 126 cities in mainland China.

Table 1. Descriptive characteristics of participants by number of ACEs<sup>a</sup> [Mean ± SD or N (%)].

| Variables                                  | ACEs (N=14484) |               |               |               |                 | P-value |
|--------------------------------------------|----------------|---------------|---------------|---------------|-----------------|---------|
|                                            | 0<br>(N=2935)  | 1<br>(N=4472) | 2<br>(N=3518) | 3<br>(N=2045) | ≥ 4<br>(N=1514) |         |
| Age (years)                                | 60.29±9.52     | 60.84±9.51    | 61.02±9.61    | 60.48±9.31    | 60.68±9.47      | 0.012   |
| Sex (%)                                    |                |               |               |               |                 |         |
| Men                                        | 1296 (44.2)    | 2116 (47.3)   | 1743 (49.5)   | 1027 (50.2)   | 743 (49.1)      | <0.001  |
| Women                                      | 1639 (55.8)    | 2356 (52.7)   | 1775 (50.5)   | 1018 (49.8)   | 771 (50.9)      |         |
| BMI (kg/m <sup>2</sup> )                   | 23.95±3.85     | 23.81±3.86    | 23.77±3.71    | 23.78±3.59    | 23.45±3.81      | 0.001   |
| Educational level                          |                |               |               |               |                 |         |
| ≥ Middle school                            | 1142 (38.9)    | 1572 (35.1)   | 1089 (31.0)   | 638 (31.2)    | 424 (28.0)      | <0.001  |
| < Middle school                            | 1793 (61.1)    | 2900 (64.9)   | 2429 (69.0)   | 1407 (68.8)   | 1090 (72.0)     |         |
| Marriage status                            |                |               |               |               |                 |         |
| Married                                    | 2576 (87.8)    | 3901(87.2)    | 3033 (86.2)   | 1771 (86.6)   | 1271(83.9)      | 0.006   |
| Unmarried                                  | 359 (12.2)     | 571 (12.8)    | 485 (13.8)    | 274 (13.4)    | 243 (16.1)      |         |
| Maternal education                         |                |               |               |               |                 |         |
| ≥ Middle school                            | 1106 (37.7)    | 1485 (33.2)   | 1274 (36.2)   | 804 (34.4)    | 540 (35.6)      | <0.001  |
| < Middle school                            | 1829 (62.3)    | 2987 (66.8)   | 2244 (63.8)   | 1341 (65.6)   | 974 (64.4)      |         |
| Paternal education                         |                |               |               |               |                 |         |
| ≥ Middle school                            | 378 (12.9)     | 538 (12.0)    | 404 (11.5)    | 217 (10.6)    | 166 (11.0)      | 0.106   |
| < Middle school                            | 2557 (87.1)    | 3934 (88.0)   | 3114 (88.5)   | 1828 (89.4)   | 1348 (89.0)     |         |
| Family's financial status during childhood |                |               |               |               |                 |         |
| Same as or better than others              | 2140 (72.9)    | 2928 (65.5)   | 2028 (57.6)   | 991 (48.5)    | 620 (41.0)      | <0.001  |
| Worse than others                          | 795 (27.1)     | 1544 (34.5)   | 1490 (42.4)   | 1054 (51.5)   | 894 (59.0)      |         |
| Cigarette smoking status                   |                |               |               |               |                 |         |
| Current                                    | 740 (25.2)     | 1241(27.8)    | 1042 (29.6)   | 601 (29.4)    | 457 (30.2)      | 0.002   |
| Never                                      | 1802 (61.4)    | 2629 (58.8)   | 1992 (56.6)   | 1162 (56.8)   | 859 (56.7)      |         |
| Former                                     | 393 (13.4)     | 602 (13.4)    | 484 (13.8)    | 282 (13.8)    | 198 (13.1)      |         |
| Alcohol consumption                        |                |               |               |               |                 |         |
| Yes                                        | 909 (31.0)     | 1490 (33.3)   | 1309 (37.2)   | 732 (35.8)    | 593 (39.2)      | <0.001  |
| No                                         | 2026 (69.0)    | 2482 (66.7)   | 2209 (62.8)   | 1313 (64.2)   | 921 (60.8)      |         |
| Social activity                            |                |               |               |               |                 |         |
| Yes                                        | 1570 (53.5)    | 2457 (54.9)   | 1877 (53.4)   | 1114 (54.5)   | 838 (55.4)      | 0.484   |
| No                                         | 1365 (46.5)    | 2015 (45.1)   | 1641 (46.6)   | 931 (45.5)    | 676 (44.6)      |         |
| Night sleep duration (hours)               | 6.61±1.88      | 6.47±1.92     | 6.29 ±1.94    | 6.19±2.03     | 5.89 ±2.12      | <0.001  |
| Chronic diseases                           |                |               |               |               |                 |         |
| Hypertension                               | 688 (23.4)     | 1054 (23.6)   | 848 (24.1)    | 478 (23.4)    | 303 (20.0)      | 0.031   |
| Diabetes                                   | 172 (5.9)      | 251 (5.6)     | 197 (5.6)     | 139 (6.7)     | 98 (6.4)        | 0.279   |
| Heart diseases                             | 351 (12.0)     | 521 (11.6)    | 448 (12.7)    | 265 (13.0)    | 192 (12.7)      | 0.448   |

a: ACEs indicated adverse childhood experiences.

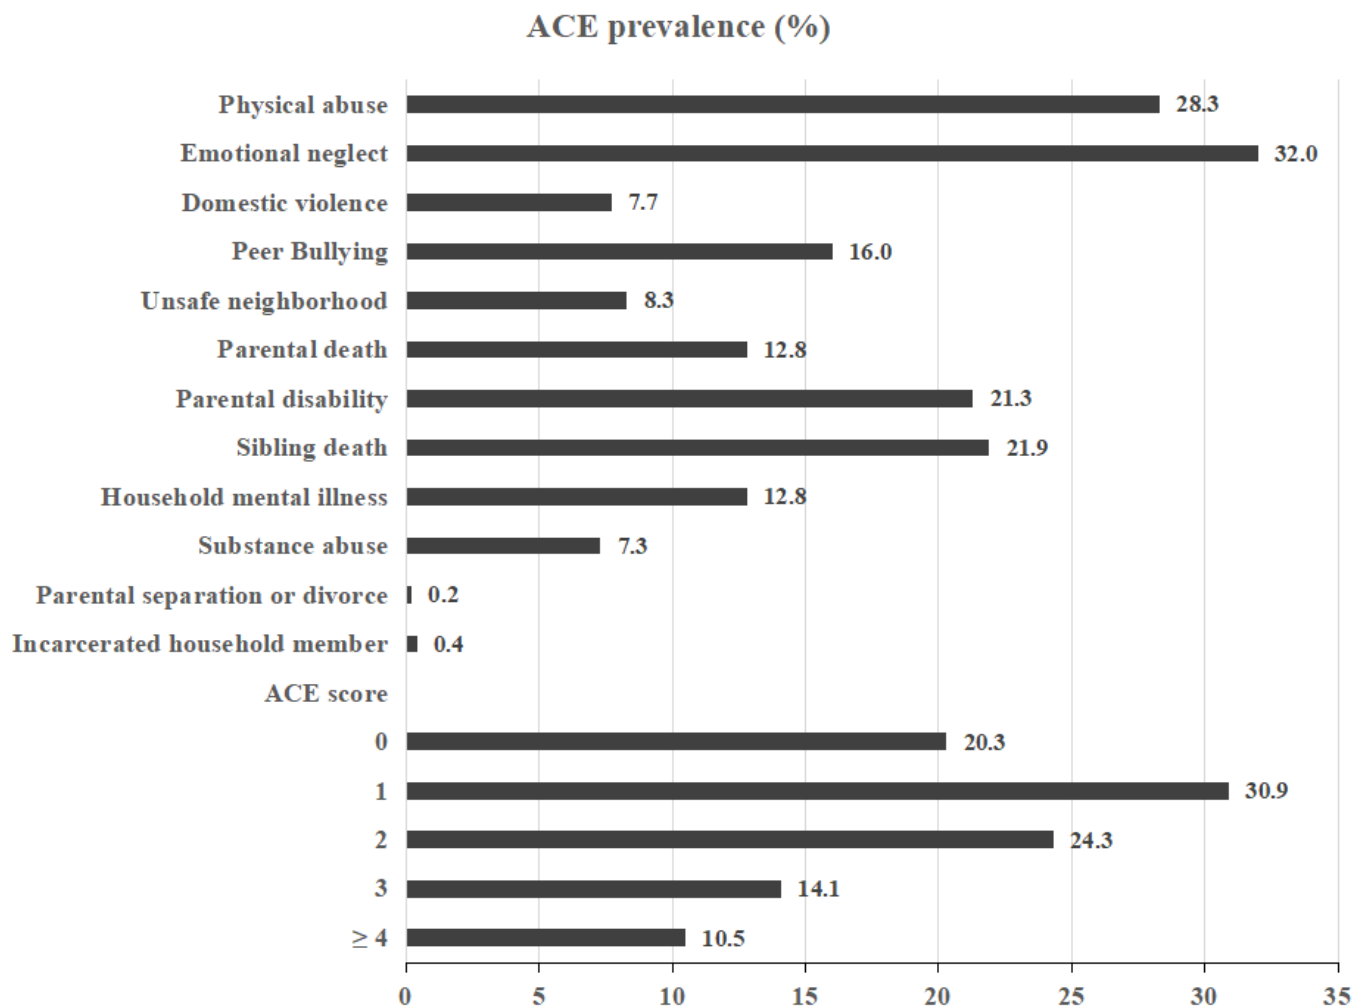

Figure 2. The prevalence of each item of ACEs among the participants.



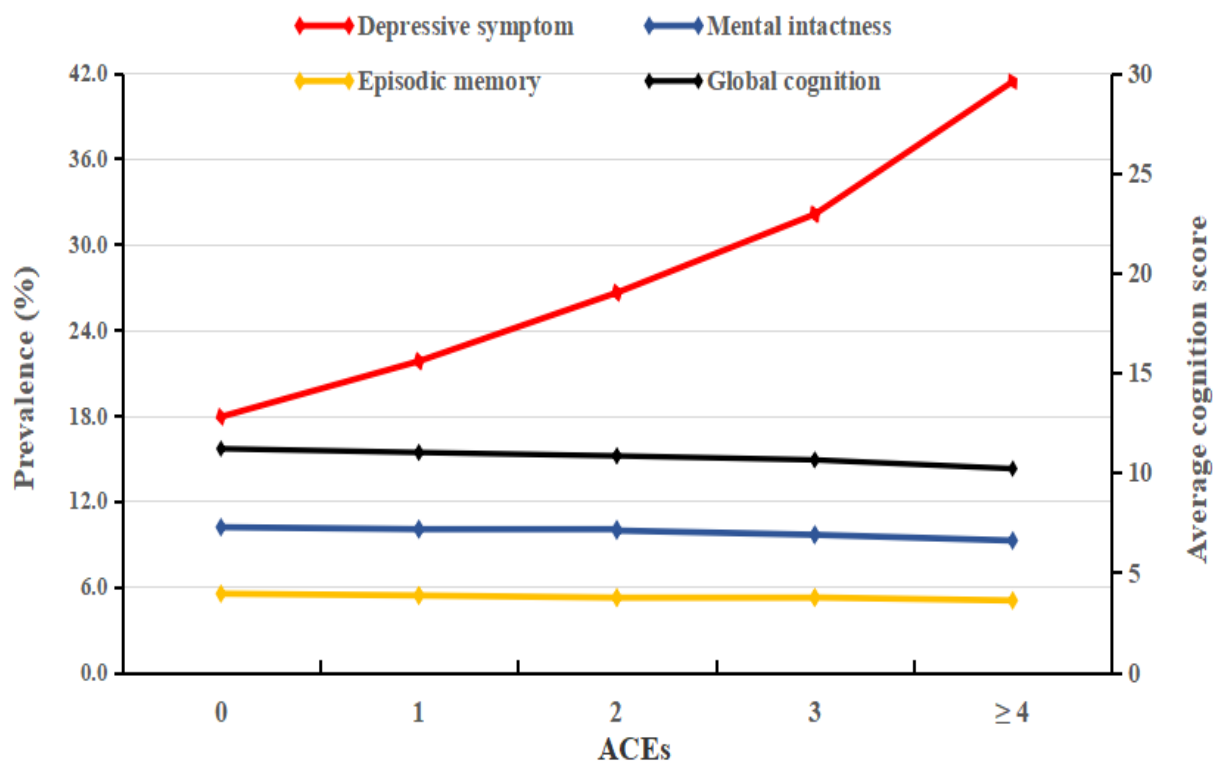

Figure 3. The trend of depression prevalence and average cognitive score according to the number of ACEs.

Table 2. The association between adverse childhood experiences with depression and cognitive performance in adulthood.

|                              |     | ACEs (N=14484) |                             |                              |                               |                               | P for trend |
|------------------------------|-----|----------------|-----------------------------|------------------------------|-------------------------------|-------------------------------|-------------|
|                              |     | 0<br>(N=2935)  | 1<br>(N=4472)               | 2<br>(N=3518)                | 3<br>(N=2045)                 | ≥ 4<br>(N=1514)               |             |
| <b>Depression</b>            |     |                |                             |                              |                               |                               |             |
| Model □                      | Ref |                | 1.28<br>(1.14-1.44)**       | 1.67<br>(1.47-1.87)***       | 2.18<br>(1.91-2.48)***        | 3.25<br>(2.83-3.73)***        | <0.001      |
| Model □                      | Ref |                | 1.24<br>(1.07-1.43)**       | 1.54<br>(1.32-1.78)***       | 2.03<br>(1.72-2.40)***        | 2.65<br>(2.21-3.16)***        | <0.001      |
| <b>Cognitive performance</b> |     |                |                             |                              |                               |                               |             |
| <b>Mental intactness</b>     |     |                |                             |                              |                               |                               |             |
| Model □                      | Ref |                | -0.101<br>(-0.239, 0.037)   | -0.169<br>(-0.315, -0.024)*  | -0.384<br>(-0.552, -0.217)*** | -0.667<br>(-0.852, -0.483)*** | <0.001      |
| Model □                      | Ref |                | -0.017<br>(-0.157, 0.123)   | -0.002<br>(-0.151, 0.147)    | -0.183<br>(-0.356, -0.011)*   | -0.317<br>(-0.508, -0.125)**  | 0.001       |
| <b>Episodic memory</b>       |     |                |                             |                              |                               |                               |             |
| Model □                      | Ref |                | -0.089<br>(-0.177, -0.003)* | -0.197<br>(-0.288, -0.105)** | -0.182<br>(-0.287, -0.076)**  | -0.336<br>(-0.452, -0.220)*** | <0.001      |
| Model □                      | Ref |                | 0.018<br>(-0.071, 0.107)    | -0.044<br>(-0.138, 0.049)    | -0.032<br>(-0.141, 0.076)     | -0.120<br>(-0.241, 0.001)     | 0.033       |
| <b>Global cognition</b>      |     |                |                             |                              |                               |                               |             |
| Model □                      | Ref |                | -0.190<br>(-0.383, 0.003)   | -0.366<br>(-0.569, -0.016)** | -0.567<br>(-0.800, -0.332)**  | -1.004<br>(-1.261, -0.747)*** | <0.001      |
| Model □                      | Ref |                | 0.002<br>(-0.186, 0.190)    | -0.047<br>(-0.246, 0.152)    | -0.216<br>(-0.447, 0.015)     | -0.437<br>(-0.693, -0.181)**  | <0.001      |

Note: Ref: reference

Model □: crude model.

Model □: adjusted for sex, age, BMI, educational level, marriage status, maternal education, paternal education, family's financial situation during childhood, cigarette smoking status, alcohol consumption, social activity, night sleep duration, hypertension, diabetes and heart diseases.

\* P<0.05, \*\* P<0.01, \*\*\* P<0.001

Table 3. Subgroup analysis of ACEs exposure with subsequent depression and global cognition among the subjects.

|                                                   |                               | ACEs (N=14484) |                          |                          |                           |                           | P for trend | P for interaction |
|---------------------------------------------------|-------------------------------|----------------|--------------------------|--------------------------|---------------------------|---------------------------|-------------|-------------------|
|                                                   |                               | 0              | 1                        | 2                        | 3                         | ≥ 4                       |             |                   |
| <b>Depression</b>                                 |                               |                |                          |                          |                           |                           |             |                   |
| <b>Sex</b>                                        |                               |                |                          |                          |                           |                           |             |                   |
|                                                   | Men                           | Ref            | 1.12<br>(0.87-1.44)      | 1.31<br>(1.02-1.68)*     | 2.05<br>(1.57-2.68)***    | 2.87<br>(2.17-3.79)***    | <0.001      | 0.221             |
|                                                   | Women                         | Ref            | 1.29<br>(1.08-1.55)*     | 1.67<br>(1.38-2.02)**    | 1.98<br>(1.61-2.45)***    | 2.38<br>(1.89-2.98)***    |             |                   |
| <b>Age</b>                                        |                               |                |                          |                          |                           |                           |             |                   |
|                                                   | ≥ 65 years                    | Ref            | 1.02<br>(0.80-1.30)      | 1.34<br>(1.05-1.72)*     | 1.78<br>(1.35-.35)***     | 2.49<br>(1.85-3.35)***    | <0.001      | 0.675             |
|                                                   | < 65 years                    | Ref            | 1.38<br>(1.15-1.67)*     | 1.65<br>(1.37-1.99)***   | 2.17<br>(1.76-2.67)***    | 2.74<br>(2.20-3.42)***    |             |                   |
| <b>Educational level</b>                          |                               |                |                          |                          |                           |                           |             |                   |
|                                                   | ≥ Middle school               | Ref            | 1.10<br>(0.84-1.45)      | 1.42<br>(1.06-1.90)*     | 1.84<br>(1.33-2.54)***    | 2.59<br>(1.82-3.68)***    | <0.001      | 0.839             |
|                                                   | < Middle school               | Ref            | 1.29<br>(1.09-1.53)      | 1.58<br>(1.33-1.88)**    | 2.12<br>(1.74-2.58)***    | 2.68<br>(2.19-3.30)***    |             |                   |
| <b>Family's financial status during childhood</b> |                               |                |                          |                          |                           |                           |             |                   |
|                                                   | Same as or better than others | Ref            | 1.13<br>(0.95-1.35)      | 1.46<br>(1.21-1.76)**    | 1.92<br>(1.54-2.39)***    | 2.47<br>(1.93-.18)***     | <0.001      | 0.532             |
|                                                   | Worse than others             | Ref            | 1.49<br>(1.15-1.93)**    | 1.72<br>(1.34-2.22)***   | 2.31<br>(1.77-3.01)***    | 3.01<br>(2.29-3.95)***    |             |                   |
| <b>Global cognition</b>                           |                               |                |                          |                          |                           |                           |             |                   |
| <b>Sex</b>                                        |                               |                |                          |                          |                           |                           |             |                   |
|                                                   | Men                           | Ref            | 0.163<br>(-0.094, 0.421) | 0.083<br>(-0.186, 0.352) | -0.052<br>(-0.360, 0.256) | -0.256<br>(-0.599, 0.088) | 0.082       | 0.087             |

|                                                   |     |                           |                           |                             |                              |       |       |
|---------------------------------------------------|-----|---------------------------|---------------------------|-----------------------------|------------------------------|-------|-------|
| Women                                             | Ref | -0.154<br>(-0.423, 0.115) | -0.208<br>(-0.498, 0.081) | -0.391<br>(-0.731, 0.033)   | -0.600<br>(-0.975, -0.225)** | 0.001 |       |
| <b>Age</b>                                        |     |                           |                           |                             |                              |       |       |
| ≥ 65 years                                        | Ref | -0.020<br>(-0.363, 0.323) | -0.053<br>(-0.416, 0.311) | -0.267<br>(-0.687, 0.154)   | -0.453<br>(-0.922, 0.014)    | 0.036 | 0.951 |
| < 65 years                                        | Ref | -0.005<br>(-0.228, 0.218) | -0.056<br>(-0.292, 0.179) | -0.230<br>(-0.502, 0.043)   | -0.427<br>(-0.729, -0.125)** | 0.003 |       |
| <b>Educational level</b>                          |     |                           |                           |                             |                              |       |       |
| ≥ Middle school                                   | Ref | 0.001<br>(-0.268, 0.270)  | 0.096<br>(-0.198, 0.390)  | -0.035<br>(-0.384, 0.315)   | -0.433<br>(-0.834, -0.132)*  | 0.079 | 0.716 |
| < Middle school                                   | Ref | -0.027<br>(-0.275, 0.220) | -0.142<br>(-0.402, 0.116) | -0.316<br>(-0.612, -0.020)* | -0.414<br>(-0.738, -0.090)*  | 0.002 |       |
| <b>Family's financial status during childhood</b> |     |                           |                           |                             |                              |       |       |
| Same as or better than others                     | Ref | 0.029<br>(-0.191, 0.251)  | -0.012<br>(-0.254, 0.231) | -0.180<br>(-0.478, 0.118)   | -0.398<br>(-0.758, -0.019)*  | 0.012 | 0.841 |
| Worse than others                                 | Ref | -0.066<br>(-0.421, 0.289) | -0.124<br>(-0.480, 0.232) | -0.278<br>(-0.661, 0.105)   | -0.418<br>(-0.814, -0.021)*  | 0.015 |       |

\*P<0.05, \*\*P<0.01, \*\*\*P<0.001
